# Supplementary material for: Decoding Evolution of Rubioideae: Plastomes Reveal Sweet Secrets of Codon Usage, Diagnostides, and Superbarcoding
Source: MDPI journal article supplement (doi:10.3390/genes15050562), 2024-04-27
Supplement: s1 [file s1]

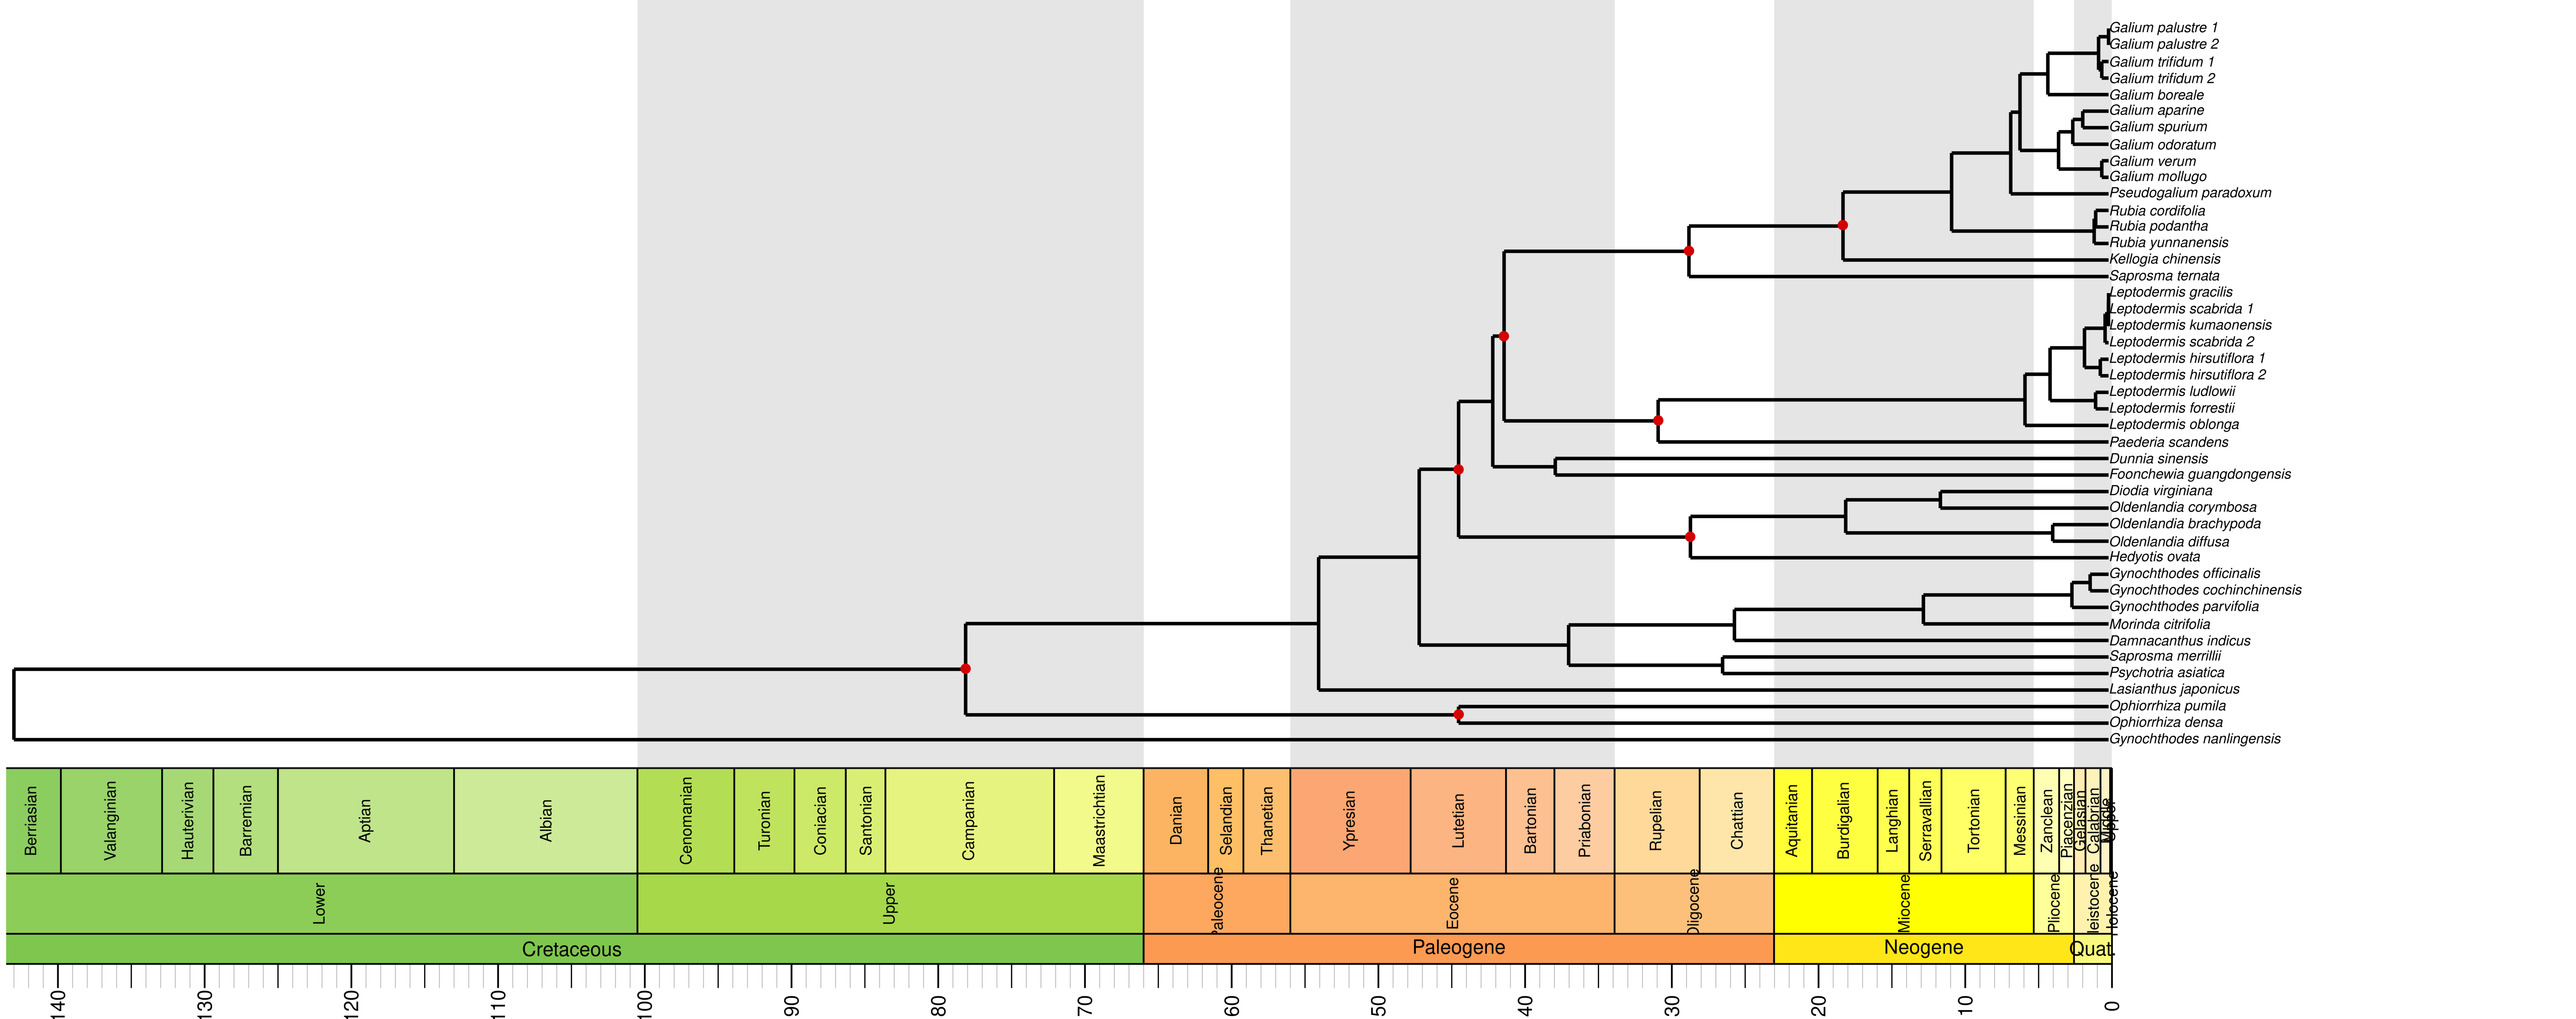

Figure S2. The divergence time tree based on fossil data. Calibration constraints are pointed in the red nodes.
